# Supplementary material for: Impact of Sample Preparation Methods on Single-Cell X-ray Microscopy and Light Elemental Analysis Evaluated by Combined Low Energy X-ray Fluorescence, STXM and AFM
Source: MDPI journal article supplement (doi:10.3390/molecules28041992), 2023-02-20
Supplement: s1 [file s1]

Supporting Information

# Impact of Sample Preparation Methods on Single-Cell X-ray Microscopy and Light Elemental Analysis Evaluated by Combined Low Energy X-ray Fluorescence, STXM and AFM

Lucia Merolle <sup>1</sup>, Lorella Pascolo <sup>2</sup>, Luisa Zupin <sup>2</sup>, Pietro Parisse <sup>3,4</sup>, Valentina Bonanni <sup>4</sup>, Gianluca Gariani <sup>4</sup>, Sasa Kenig <sup>5</sup>, Diana E. Bedolla <sup>4,6</sup>, Sergio Crovella <sup>7</sup>, Giuseppe Ricci <sup>2,8</sup>, Stefano Iotti <sup>9,10</sup>, Emil Malucelli <sup>9</sup>, George Kourousias <sup>4</sup> and Alessandra Gianoncelli <sup>4,\*</sup>

<sup>1</sup> AUSL-IRCCS di Reggio Emilia, Transfusion Medicine Unit, Reggio Emilia, 42123, Italy

<sup>2</sup> IRCCS Burlo Garofolo, Institute for Maternal and Child Health, Trieste, 34137, Italy

<sup>3</sup> Consiglio Nazionale delle Ricerche, Istituto Officina dei Materiali, Trieste, 34149, Italy

<sup>4</sup> Elettra—Sincrotrone Trieste S.C.p.A., 34149 Basovizza, 34149 Trieste, Italy

<sup>5</sup> Faculty of Health Sciences, University of Primorska, Polje 42, 6310 Izola, Slovenia

<sup>6</sup> Area Science Park, Padriciano 99, 34149 Trieste, Italy

<sup>7</sup> Biological Science Program, Department of Biological and Environmental Science, College of Arts and Sciences, Qatar University, Doha 2713, Qatar

<sup>8</sup> Department of Medical, Surgical, and Health Sciences, University of Trieste, 34149 Trieste, Italy

<sup>9</sup> Department of Pharmacy and Biotechnology, University of Bologna, 40126 Bologna, Italy

<sup>10</sup> National Institute of Biostructures and Biosystems, 00136 Rome, Italy

\* Correspondence: [alessandra.gianoncelli@elettra.eu](mailto:alessandra.gianoncelli@elettra.eu)

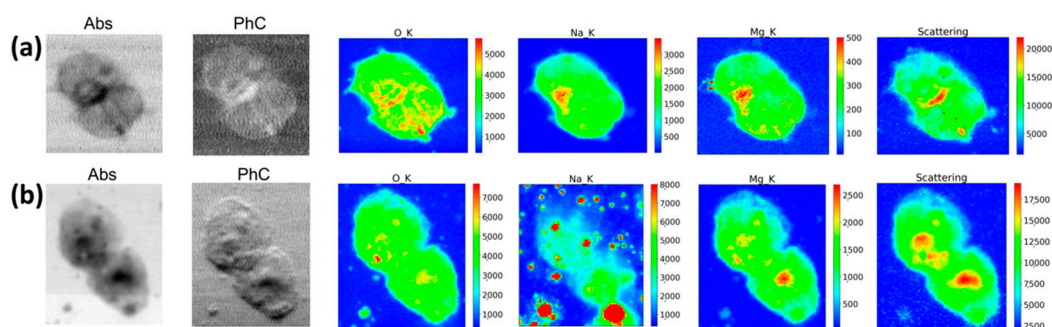

**Figure S1.** Absorption (Abs) and differential phase contrast (PhC) images, together with O, Na, Mg and scattering maps of HEK-293 cells fixed with different methods, a) 1:1 MeOH/C<sub>3</sub>H<sub>6</sub>O washed; b) and 70% Ethanol washed. Cells were fixed with the organic solvents for 3 min at -20°C, excess fixative was removed and samples were left to dry. In the washed conditions, excess fixative was removed, sample were quickly rinsed in DI water and then left to dry.

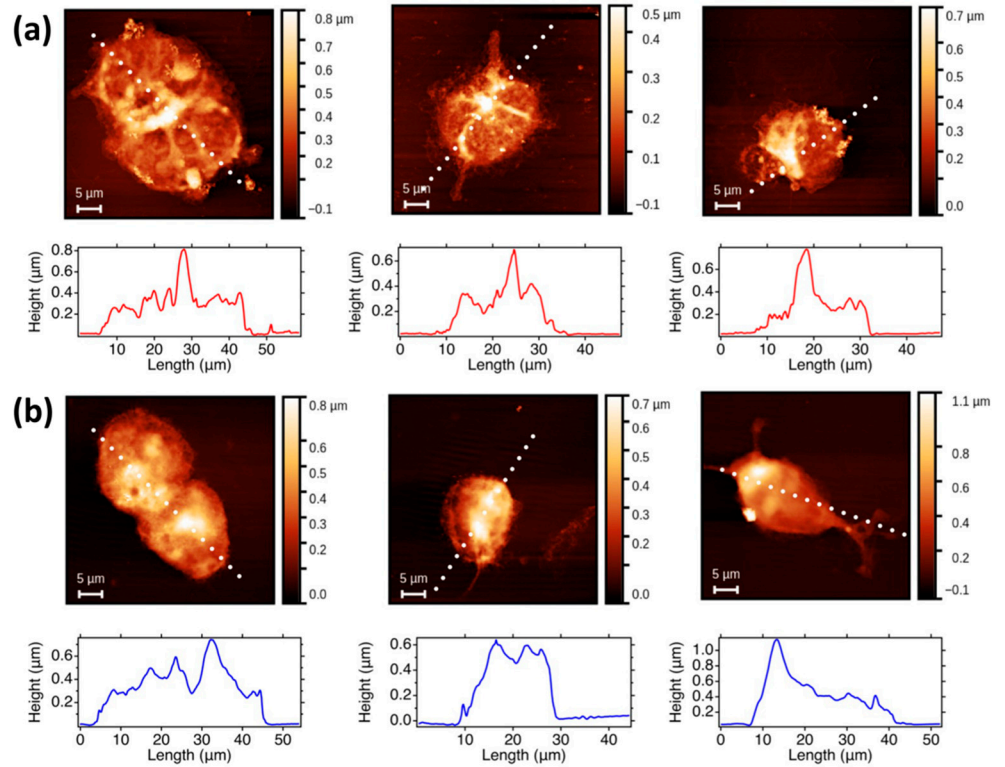

**Figure S2.** AFM images with corresponding surface profiles collected on a selection of a) 1:1 MeOH/C<sub>3</sub>H<sub>6</sub>O washed cells and of b) 70% Ethanol washed cells. The first column refers to the same cells shown in Figure S1.

#### *Descriptive statistics*

Oxygen fluorescence counts were used to assess precision of X-ray measurements related to different fixation methods. One-way ANOVA with Tukey's multiple comparisons test was performed to determine statistical significance. Statistical analysis was performed using GraphPad Prism 8.4.2 (GraphPad Software Inc., CA, USA).

**Table S1.** HEC-1-A descriptive analysis.

|                                 | <b>EtOH</b> | <b>PFA 2%</b> | <b>PFA 3.7%</b> |
|---------------------------------|-------------|---------------|-----------------|
| <i>Number of values</i>         | 6           | 6             | 6               |
| <i>Minimum</i>                  | 3670        | 2840          | 3550            |
| <i>25% Percentile</i>           | 3670        | 2840          | 3550            |
| <i>Median</i>                   | <b>3860</b> | <b>2900</b>   | <b>3840</b>     |
| <i>75% Percentile</i>           | 4130        | 4020          | 4260            |
| <i>Maximum</i>                  | 4130        | 4020          | 4260            |
| <i>Range</i>                    | <b>460</b>  | <b>1180</b>   | <b>710</b>      |
| <i>Mean</i>                     | <b>3887</b> | <b>3253</b>   | <b>3883</b>     |
| <i>Std. Deviation</i>           | 206         | 594           | 319             |
| <i>Std. Error of Mean</i>       | 84          | 242           | 10              |
| <i>Coefficient of variation</i> | 5.95%       | 18.37%        | 9.20%           |

Table S2. Spermatozoa descriptive analysis.

|                                 | EtOH        | PFA 2%       | PFA 3.7%    |
|---------------------------------|-------------|--------------|-------------|
| <b>Number of values</b>         | 8           | 6            | 7           |
| <b>Number of cells</b>          | 21          | 28           | 30          |
| <b>Minimum</b>                  | 3500        | 3880         | 3800        |
| <b>25% Percentile</b>           | 3595        | 4285         | 3890        |
| <b>Median</b>                   | <b>3985</b> | <b>4540</b>  | <b>4350</b> |
| <b>75% Percentile</b>           | 4233        | 4685         | 5350        |
| <b>Maximum</b>                  | 4740        | 4790         | 5890        |
| <b>Range</b>                    | <b>1240</b> | <b>910,0</b> | <b>2090</b> |
| <b>Mean</b>                     | <b>3975</b> | <b>4470</b>  | <b>4583</b> |
| <b>Std. Deviation</b>           | 417         | 317          | 785         |
| <b>Std. Error of Mean</b>       | 147         | 129          | 296         |
| <b>Coefficient of variation</b> | 10.51%      | 7.11%        | 17.14%      |
| <b>Sum</b>                      | 31800       | 26820        | 32080       |

Table S3. HEK-293 descriptive analysis.

|                                 | EtOH        | PFA 2%      | PFA 3.7%     | MeOH/Ac.     | Cryo-fixed   |
|---------------------------------|-------------|-------------|--------------|--------------|--------------|
| <b>Number of values</b>         | 5           | 5           | 5            | 4            | 6            |
| <b>Minimum</b>                  | 8152        | 8765        | 8981         | 17118        | 18582        |
| <b>25% Percentile</b>           | 8152        | 8765        | 8981         | 17118        | 18582        |
| <b>Median</b>                   | <b>9000</b> | <b>9231</b> | <b>10220</b> | <b>18341</b> | <b>19909</b> |
| <b>75% Percentile</b>           | 10369       | 9697        | 10685        | 19564        | 33182        |
| <b>Maximum</b>                  | 11738       | 9697        | 11149        | 19564        | 33182        |
| <b>Range</b>                    | <b>3586</b> | <b>932</b>  | <b>2168</b>  | <b>2446</b>  | <b>14600</b> |
| <b>Mean</b>                     | <b>9208</b> | <b>9138</b> | <b>10117</b> | <b>18341</b> | <b>23891</b> |
| <b>Std. Deviation</b>           | 1476        | 538         | 1088         | 1412         | 7221         |
| <b>Std. Error of Mean</b>       | 660         | 269         | 628          | 706          | 2948         |
| <b>Coefficient of variation</b> | 16.03%      | 5.58%       | 9.48%        | 7.70%        | 30.23%       |

**Table S4.** HEK-293 Student's t-test analysis.

| Tukey's Comparisons     | Mean Diff. | Significant? | Summary | Adjusted p-value |
|-------------------------|------------|--------------|---------|------------------|
| EtOH vs. Cryo-fixed     | -14683     | Yes          | *       | 0,0202           |
| PFA 2% vs. Cryo-fixed   | -14753     | Yes          | *       | 0,0368           |
| PFA 3.7% vs. Cryo-fixed | -13981     | Yes          | *       | 0,0243           |

\*P < 0.05.

**Table S5.** Comparison between AFM, STXM and LEXRF.

| Technique | Attenuation length @ 1500eV                   | Chemical Sensitivity                          | Lateral Resolution                                   | Vertical Resolution | Measurement time per pixel | Sample environment |
|-----------|-----------------------------------------------|-----------------------------------------------|------------------------------------------------------|---------------------|----------------------------|--------------------|
| AFM       | NA                                            | NA                                            | 80-100nm                                             | 0.5 nm              | 20-40 ms                   | Air                |
| STXM      | 5um                                           | NA                                            | 200-1000nm                                           | NA                  | 10-20ms                    | Vacuum             |
| LEXRF     | 0.2um for O, 1um for Na, 3um for Mg emissions | 0.2um for O, 1um for Na, 3um for Mg emissions | 200-1000nm but for Signal/noise ratio reasons >400nm | NA                  | 1-5 s                      | Vacuum             |
